# Supplementary material
Source: publisher figshare collection journal article supplement (https://rs.figshare.com/ndownloader/files/15084575)
Supplement: Supplementary file 1 [file 15084575]

City,Abbreviation,Downtown Latitude,Downtown Longitude,alpha,epsilon,Region,Founding Year,City Proper Land Area (km^2),Metro Area Population,Avg. Number Manuevers,Avg. Speed (km/h),Avg. Trip Time (min),Avg. Speed w/traffic (km/h),Avg Time w/traffic (min,Traffic Speed Factor,INRIX All Cities Rank,INRIX Congestion Index,INRIX Percent Time in Congestion,INRIX Hours in Congestion
'Abbottabad',ABO,34.194077,73.235438,0.35,1.86734694,'AS',1863,18010,1430238,5.2522,27.5996,85.9133,26.889,88.1838,0.97425,,,,
'Abu Dhabi',AUH,37.984107,23.728124,0.39,1.62169312,'ME',1790,972,1145000,12.7913,63.6312,32.0313,62.5807,32.569,0.98349,,,,
'Abuja',ABV,24.453878,54.377324,0.4,1.35714286,'AF',1984,713,6000000,7.7391,35.3356,40.4349,34.9243,40.911,0.98836,,,,
"'Amarillo, TX'",AMA,9.061391,7.500532,0.21,1.26315789,'NA',1887,233.9,276020,5.4087,68.244,19.6439,66.8125,20.0648,0.97902,892,1.6,3,7.7
'Amsterdam',AMS,35.222015,-101.830963,0.32,1.49707602,'EU',1306,219.32,2431000,11.4348,52.7472,31.4025,50.1567,33.0243,0.95089,215,4.8,9,26.5
"'Ann Arbor, MI'",ARB,52.370378,4.895293,0.18,1.27142857,'NA',1824,72.08,344791,6.5739,56.4056,24.0584,53.6138,25.3112,0.95051,257,3.8,6,24.4
'Athens',ATH,42.2794,-83.7408,0.32,1.58064516,'EU',-1400,38.964,4173542,6.9739,46.3128,33.7672,42.0201,37.2168,0.90731,,,,
'Bangalore',BLR,39.907689,116.399319,0.2,1.35087719,'AS',1537,709,8728906,13.3739,27.5214,51.6981,24.262,58.6432,0.88157,,,,
'Bangkok',BKK,41.403187,2.187246,0.25,1.41176471,'AE',1782,1568.737,14565547,10.7913,44.6327,33.4632,38.6178,38.6752,0.86524,12,12.6,23,64.1
'Barcelona',BCN,12.972069,77.593927,0.13,1.4454023,'EU',343,101.4,5375774,12.1478,49.3585,31.3404,47.0704,32.8639,0.95364,124,6.6,12,33.8
'Beijing',PEK,48.873799,2.295038,0.23,1.36337209,'AE',-1046,16411,24900000,9.1391,37.807,38.1671,35.7463,40.3674,0.94549,,,,
'Benghazi',BEN,13.756328,100.501755,0.36,1.33783784,'AF',-525,314,1110000,9.8348,51.8176,24.6709,51.8716,24.6452,1.001,,,,
"'Boston, MA'",BOS,32.100959,20.075149,0.25,1.37790698,'NA',1822,125.4,4628910,11.4348,50.8464,29.0599,47.3476,31.2072,0.93119,18,10.2,13,57.6
"'Bozeman, MT'",BZN,48.257839,13.035135,0.17,1.36144578,'NA',1867,49.6,97308,4.3391,53.4292,26.2029,50.5264,27.7083,0.94567,908,1.6,4,7.4
'Brasilia',BSB,-15.775672,-47.939507,0.33,1.34916201,'SA',1960,5802,2977216,11.9739,52.0161,29.7164,51.5999,29.9561,0.992,209,5.4,11,26.8
'Brasov',BRV,45.679348,-111.062498,0.25,1.26836158,'EU',1234,74,369896,10.4,46.0312,30.548,44.2663,31.7659,0.96166,,,,
'Braunau',BRA,42.360492,-71.057369,0.18,1.28409091,'EU',1260,24.85,16717,10.3478,51.9446,26.7042,50.3218,27.5654,0.96876,,,,
'Byblos',BYB,45.652546,25.608291,0.1,1.72058824,'ME',-7000,5,100000,12.4174,46.1165,38.7175,44.0238,40.558,0.95462,,,,
'Cabo San Lucas',SJD,31.230172,121.473862,0.27,1.23952096,'SA',1917,10,68463,7.913,36.6145,35.3749,35.7319,36.2487,0.9759,,,,
'Cairo',CAI,34.123551,35.653357,0.13,1.43674699,'ME',969,528,20439541,10.2,35.8945,40.4322,31.1433,46.6004,0.86764,,,,
'Calgary',YYC,25.323726,82.999956,0.39,1.4505814,'NA',1875,586.08,1392609,8.4348,61.9197,25.7242,59.1065,26.9486,0.95457,481,2.8,5,15.7
'Caracas',CCS,22.879472,-109.912513,0.28,1.64144737,'SA',1567,777.1,2923959,10.713,46.4049,34.5506,44.0773,36.3751,0.94984,13,11.8,21,62.6
'Chengdu',CTU,30.658764,104.063333,0.16,1.35087719,'AE',311,3679.9,10484996,11,34.8185,40.6871,34.5455,41.0086,0.99216,,,,
"'College Park, MD'",CGS,51.047736,-114.072721,0.3,1.46242775,'NA',1856,14.61,32275,7.5913,56.4831,28.4233,55.2735,29.0454,0.97858,,,,
"'College Station, TX'",CLL,10.497171,-66.884844,0.3,1.30346821,'NA',1876,128.5,236819,5.3391,64.397,22.0343,61.0243,23.2522,0.94763,,,,
'Cusco',CUZ,38.987688,-76.939856,0.41,1.66666667,'SA',1100,385.1,435114,11.2087,32.3613,61.0214,31.7159,62.2632,0.98006,,,,
'Damascus',DAM,30.627892,-96.334875,0.22,1.359375,'ME',-1350,105,1711000,10.513,35.5614,37.3658,35.5685,37.3584,1.0002,,,,
'Delhi',DEL,33.512151,36.300428,0.15,1.34482759,'AS',-500,1484,26454000,15.313,27.7294,51.2009,23.2873,60.9675,0.83981,,,,
"'Denver, CO'",DEN,28.631764,77.216647,0.26,1.38461538,'NA',1858,397.13,2814330,6.3043,59.1872,24.9938,55.0814,26.8568,0.93063,107,6.4,8,36
"'Detroit, MI'",DTW,42.33023,-83.040512,0.21,1.31626506,'NA',1701,138.75,4292060,6.3478,61.0247,22.031,58.9443,22.8086,0.96591,128,5.9,6,33.5
'Donetsk',DOK,39.739273,-104.988912,0.25,1.41176471,'EU',1869,358,2009700,11.5391,38.3057,39.221,37.2442,40.3388,0.97229,,,,
'Frankfurt',EBB,42.194348,-73.362454,0.17,1.36549708,'EU',0,248.31,5604523,12.4696,43.4453,32.7501,42.1805,33.7322,0.97089,83,6.5,11,39.4
"'Fresno, CA'",FRA,0.315316,32.568537,0.24,1.21212121,'NA',1885,297.07,972297,5.3913,68.7925,18.0287,66.7544,18.5791,0.97037,836,1.8,4,8.7
"'Great Barringon, MA'",FAT,14.625452,-90.511551,0.23,1.29255319,'NA',1761,116,7104,4.0783,56.8084,26.4645,55.214,27.2287,0.97193,,,,
'Guatemala City',GBR,-17.832432,31.030585,0.24,1.59593023,'SA',1776,692,2749161,15.0696,30.8856,54.9071,29.2574,57.9629,0.94728,,,,
'Harare',GUA,23.123875,-82.386019,0.18,1.21381579,'AF',1890,960.6,1619000,7.3304,41.8896,26.9513,41.8937,26.9487,1.0001,,,,
'Havana',HAR,49.40471,8.67704,0.2,1.2724359,'SA',1592,728.26,2106146,9.1652,40.8338,30.0259,40.859,30.0074,1.0006,,,,
'Heidelberg',HAV,50.671263,5.632354,0.22,1.52857143,'EU',863,108.83,156267,9.5043,50.8523,32.3751,49.5489,33.2267,0.97437,,,,
'Herstal',HEI,36.73465,-119.789177,0.22,1.43859649,'EU',718,23.54,39617,13.887,59.2693,25.6954,57.2293,26.6113,0.96558,415,3.1,6,18.7
'Ho Chi Minh City',FNH,-33.436628,-70.634433,0.24,1.27777778,'AE',1698,2096.56,8426100,10.1217,28.7268,47.4417,28.7325,47.4323,1.0002,,,,
'Hong Kong',SGN,10.824696,106.627946,0.37,1.56060606,'AE',1841,2755,7374900,8.8087,53.2553,31.8551,51.4022,33.0035,0.9652,,,,
"'Houston, TX'",HKG,22.283307,114.158057,0.26,1.26315789,'NA',1837,1642.1,6313158,8.0522,71.1125,18.8052,66.6196,20.0735,0.93682,28,8.5,7,51.6
"'Indianapolis, IN'",HOU,39.768485,-86.157992,0.15,1.3,'NA',1832,953.18,2004230,8.1565,57.5765,24.1254,56.0954,24.7623,0.97428,430,3.1,5,18
'Istanbul',IND,41.008167,28.978433,0.24,1.53571429,'EU',-660,1539,14657434,18.6696,38.3546,41.7204,31.0001,51.6183,0.80825,17,12.2,19,58.6
"'Ithaca, NY'",IST,42.439633,-76.495631,0.14,1.17567568,'NA',1790,15.73,101564,5.2957,56.3709,23.5526,55.1782,24.0617,0.97884,,,,
'Jakarta',ITH,30.044035,31.235787,0.21,1.46686747,'AE',397,661.5,9607787,14.1304,30.7587,48.7636,24.7084,60.7043,0.8033,22,11.8,17,55
'Jerusalem',CGK,-6.180211,106.823122,0.3,1.79881657,'ME',-1010,125.156,1124300,18.113,34.5858,56.3558,33.7018,57.8339,0.97444,,,,
'Johannesburg',JER,31.768923,35.214903,0.25,1.40229885,'AF',1886,334.81,8434292,8.4087,53.2417,28.2397,50.4983,29.7739,0.94847,44,7.3,9,46.8
'Juba',JNB,-26.202774,28.045362,0.35,1.15410959,'AF',1922,52,492970,5.0696,31.8112,33.9052,31.8213,33.8945,1.0003,,,,
'Kabul',JUB,4.855094,31.580053,0.26,1.3649635,'AS',-1200,275,4600000,11.9739,26.6178,44.2577,26.6262,44.2436,1.0003,,,,
'Kampala',KBL,48.020188,37.806811,0.21,1.22058824,'AF',1900,56.2,69958,9.087,27.3012,46.8496,27.302,46.8483,1,,,,
'Karachi',KHI,34.512635,69.118101,0.17,1.34090909,'AS',1729,3780,14910352,10.2087,28.9327,44.2071,27.489,46.5288,0.9501,,,,
'Kiev',IEV,29.76046,-95.369827,0.24,1.43604651,'EU',482,839,3375000,12.087,44.268,34.831,39.4485,39.0864,0.89113,,,,
'Kinshasa',FIH,50.110908,8.682011,0.22,1.32208589,'AF',1881,600,11855000,8.9043,28.2186,47.4713,28.2249,47.4607,1.0002,,,,
'Kragujevac',KRA,50.450343,30.524464,0.28,1.31609195,'EU',1476,835,179417,6.7304,44.1944,32.5606,43.5253,33.0612,0.98486,,,,
'Liege',LGG,50.634249,5.582047,0.22,1.40462428,'EU',682,69.39,196970,10.6087,58.2684,25.8932,54.8751,27.4943,0.94176,415,3.1,6,18.7
'London',LON,51.507445,-0.128004,0.19,1.33430233,'EU',43,1572,13870757,15.6957,30.5482,46.2387,27.2689,51.7991,0.89265,7,13.9,13,73.4
"'Los Angeles, CA'",LAX,-4.332734,15.3106,0.16,1.3125,'NA',1850,1302.15,13131431,8.7043,53.0795,24.05,49.0633,26.0187,0.92434,1,18.6,13,104.1
'Maadi',MAA,34.052312,-118.243493,0.3,1.61046512,'ME',1904,,,12.2783,41.8774,41.8194,41.4623,42.2381,0.99009,,,,
'Managua',MGA,6.265685,-75.575068,0.28,1.27941176,'SA',1819,173.7,2560789,7.9565,33.0031,41.5596,32.4922,42.213,0.98452,,,,
'Marrakesh',RAK,45.523121,-122.676466,0.31,1.2388535,'AF',1062,143.02,1063415,12.7565,38.0488,32.5635,36.8289,33.642,0.96794,,,,
'Mecca',MEC,12.15102,-86.274239,0.32,1.48742138,'ME',741,760,1675368,13,47.2155,32.2325,47.562,31.9977,1.0073,300,5.7,14,22.9
'Medellin',MDE,29.96332,31.260845,0.26,1.67528736,'SA',1616,380.64,3731447,11.687,34.5023,53.297,34.4181,53.4274,0.99756,30,10,19,50.2
'Melbourne',MEL,31.632565,-7.987135,0.2,1.3591954,'AS',1835,9990,4725316,9.6783,45.5702,31.711,43.471,33.2423,0.95394,,,,
'Mexico City',MEX,21.421923,39.821772,0.21,1.36764706,'SA',1325,1485,20400000,15.4261,30.5897,46.6687,25.4455,56.1036,0.83183,14,12.9,13,61.5
'Milan',MXP,45.464412,9.188556,0.25,1.50578035,'EU',-400,181.76,1368590,25.8609,36.936,44.1097,36.1915,45.0171,0.97984,137,5.6,9,32.8
'Montreal',MTL,19.432911,-99.134184,0.17,1.34883721,'NA',1832,431.5,4098927,10.2174,42.298,33.4116,40.9514,34.531,0.96814,27,9.7,14,52
'Moscow',MSK,-37.809946,144.962629,0.14,1.27616279,'EU',1147,2511,17100000,11.8783,35.2842,37.7881,25.9488,51.1473,0.74067,2,19.9,25,91.4
'Nairobi',NAI,45.5019,-73.5674,0.24,1.36982249,'AF',1899,696,6547547,9.3391,34.8196,41.4777,29.8384,48.402,0.85694,,,,
"'New York, NY'",NYC,55.75701,37.615187,0.26,1.42682927,'NA',1898,783.84,20153634,10.7826,40.8855,35.2764,37.7562,38.2001,0.92346,3,17.4,13,89.4
'Osaka',KIX,24.877449,67.04417,0.16,1.34848485,'AE',645,223,19341976,12.6435,41.7814,32.5201,40.7578,33.3368,0.9755,,,,
'Paris',PAR,-1.289254,36.827177,0.29,1.43859649,'EU',-52,105.4,12405426,10.9565,49.1336,31.44,43.4423,35.5588,0.88417,10,11.8,11,65.3
"'Pittsburgh, PA'",PIT,40.440636,-79.995962,0.14,1.33430233,'NA',1758,151.12,2360867,7.9043,56.3712,24.6322,53.6919,25.9086,0.9487,131,5.6,11,33.4
'Plovdiv',PDV,40.713699,-74.00528,0.2,1.28409091,'EU',-6000,101.98,675586,6.6087,44.6961,31.0739,42.6795,32.5422,0.95488,,,,
"'Portland, OR'",PDX,34.693817,135.501103,0.22,1.36764706,'NA',1845,376,2389228,7.9217,54.235,26.6093,50.7231,28.5959,0.93321,40,7.7,10,47.2
'Pyongyang',PYO,42.142827,24.751564,0.16,1.28901734,'AE',-1122,3194,2581076,8.4957,49.5915,27.7958,49.5835,27.8003,0.99984,,,,
"'Raleigh, NC'",RDU,39.040123,125.766022,0.17,1.32163743,'NA',1792,369,1337331,6.3043,59.5047,23.1564,57.8199,23.8312,0.97168,432,3.1,6,18
'Reykjavik',REY,35.779572,-78.638174,0.57,1.23734177,'EU',1786,273,123246,12.2957,56.6552,24.4446,55.6272,24.8964,0.98186,,,,
'Rio de Janeiro',RIO,64.126843,-21.817373,0.39,1.66091954,'SA',1565,486.5,12280702,12.7739,48.2998,39.3961,46.5882,40.8435,0.96456,29,11.1,16,50.7
'Riyadh',RUH,-22.906783,-43.172921,0.23,1.47256098,'ME',1823,1798,6506700,13.9652,52.6654,28.3503,47.9192,31.1583,0.90988,88,9,16,39
"'San Francisco, CA'",SFO,13.482588,-88.17531,0.34,1.34340659,'NA',1850,121.46,4679166,6.3913,55.1931,28.6455,49.2979,32.071,0.89319,4,14.4,13,82.6
'San Jose',SJO,2.288211,111.831154,0.22,1.46969697,'NA',1823,44.62,2158898,15.713,31.8056,47.2926,30.4679,49.6237,0.9564,,,,
"'San Juan, PR'",SJU,59.93502,30.330432,0.18,1.44207317,'SA',1509,124,2350126,10.3217,52.7298,27.4286,47.4726,30.4661,0.9003,94,6.6,11,37.4
'San Miguel',SSM,40.794456,-77.861643,0.3,1.2734375,'SA',1541,,139297,7.7304,37.1423,41.378,36.2518,42.3945,0.97602,,,,
'Santiago',SCL,18.418391,-66.074359,0.21,1.3807947,'SA',1541,641,7314176,8.9652,42.9408,29.9823,39.59,32.52,0.92197,,,,
'Sao Paulo',SAO,24.713466,46.675313,0.16,1.38235294,'SA',1554,587.3,21242939,16.5913,33.249,43.1139,27.4952,52.0667,0.82534,6,15.8,21,77.2
'Shanghai',SHA,-23.55055,-46.634347,0.21,1.4601227,'AE',-4000,6341,34000000,12.2783,41.3402,35.3054,37.2386,39.1941,0.90078,,,,
'Sibu',SBW,37.775049,-122.419386,0.45,1.43413174,'AS',1862,129.5,162676,7.6435,42.3651,36.9043,41.8957,37.3178,0.98892,,,,
'St. Petersburg',LED,44.009123,20.914094,0.12,1.36624204,'EU',1703,1439,7500000,14.8609,32.9224,39.9561,27.665,47.5493,0.84031,26,11.3,20,52.7
"'State College, PA'",SCE,9.937977,-84.098161,0.28,1.48913043,'NA',1896,11.8,158742,6.0261,58.4214,29.4316,57.0872,30.2085,0.9778,,,,
'Sydney',SYD,-33.869313,151.212055,0.26,1.40584416,'AS',1788,12367,5029768,9.4435,47.6276,28.3617,44.2485,30.5277,0.92905,,,,
'Taipei',TPE,32.079545,34.780541,0.24,1.62903226,'AE',1709,271.8,8500000,12.5478,42.833,36.3983,43.4574,35.8752,1.0146,,,,
'Tel Aviv',TEL,25.041355,121.560244,0.2,1.45857988,'ME',1909,52,3785000,11.6,50.7567,30.0371,46.4393,32.8296,0.91494,,,,
'Tokyo',TYO,32.177896,-110.943866,0.27,1.43413174,'AE',1457,2187.66,37800000,14.0087,43.3376,34.7426,37.6818,39.9572,0.86949,,,,
'Toronto',YYZ,38.906917,-77.036553,0.33,1.47687861,'NA',1793,630.21,5928040,9.5217,56.4104,28.9036,46.5529,35.0239,0.82525,53,8.4,12,45.6
"'Tucson, AZ'",TUS,43.653354,-79.382793,0.23,1.3125,'NA',1877,612.55,1010025,6.8348,56.0463,23.0333,53.983,23.9038,0.96436,717,2,4,10.5
"'Tulsa, OK'",TUL,35.678963,139.743122,0.26,1.27941176,'NA',1898,483.1,961561,7,64.2556,21.0478,63.3161,21.3601,0.98538,765,1.8,3,9.7
'Vancouver',YVR,49.283298,-123.120903,0.22,1.35947712,'NA',1886,114.97,2463431,8.4609,35.969,35.7422,32.946,39.0217,0.91596,157,5.3,9,30.4
'Varanasi',VNS,36.15483,-95.990296,0.21,1.27456647,'AS',-2000,82.1,1435113,9.487,24.6103,55.4564,23.3295,58.5009,0.94796,,,,
'Washington DC',DCA,-13.516516,-71.978488,0.17,1.34883721,'NA',1801,158.1,6097684,10.2174,42.298,33.4116,40.9715,34.5797,0.96819,15,10.5,11,61
'Zurich',ZUR,47.377071,8.539894,0.18,1.38793103,'EU',318,87.88,402762,10.6783,49.7389,30.0617,47.1638,31.703,0.94823,25,9.5,18,53.5
,,,,,1.38793103,,,,,,,,,,,,,,
